# Supplementary material for: Circulating Magnesium and Risk of Major Adverse Cardiac Events among Patients with Atrial Fibrillation in the ARIC Cohort
Source: MDPI journal article supplement (doi:10.3390/nu15051211), 2023-02-28
Supplement: s1 [file s1]

Supplemental Table S1. Visit 5 characteristics of participants in ARIC grouped by Mg concentration levels (N=413)

|                                      | Mg concentration level (mg/dL) |             |              |
|--------------------------------------|--------------------------------|-------------|--------------|
|                                      | < 1.7                          | 1.7-2.2     | > 2.2        |
| N                                    | 27                             | 353         | 33           |
| Age, years                           | 77.5 (4.4)                     | 77.9 (5.4)  | 80.2 (5.2)   |
| Sex, %women                          | 14 (51.9)                      | 154 (43.6)  | 19 (57.6)    |
| Race, %African American              | 2 (7.4)                        | 47 (13.3)   | 9 (27.3)     |
| Body mass index, kg/m <sup>2</sup>   | 30 (7.3)                       | 29.3 (6.1)  | 27.9 (6)     |
| Systolic blood pressure, mmHg        | 131 (27.7)                     | 127.4 (18)  | 132.4 (22.7) |
| High density lipoprotein, mg/L       | 45.4 (13.4)                    | 49.2 (13.7) | 54.9 (14.5)  |
| Low density lipoprotein, mg/L        | 77.3 (27.4)                    | 93.2 (32.6) | 100.3 (41.6) |
| eGFR, mL/min per 1.73 m <sup>2</sup> | 63.1 (16.8)                    | 58.7 (16.8) | 40.7 (19.9)  |
| Smoking Status                       |                                |             |              |
| Current smoker                       | 2 (8)                          | 19 (6)      | 1 (3.3)      |
| Former smoker                        | 15 (60)                        | 188 (59.1)  | 18 (60)      |
| Never smoker                         | 8 (32)                         | 111 (34.9)  | 11 (36.7)    |
| Drinking Status                      |                                |             |              |
| Current drinker                      | 13 (50)                        | 166 (49.3)  | 11 (35.5)    |
| Former drinker                       | 10 (38.5)                      | 102 (30.3)  | 12 (38.7)    |
| Never drinker                        | 3 (11.5)                       | 69 (20.5)   | 8 (25.8)     |
| Blood cholesterol treatment, %       | 22 (81.5)                      | 221 (63.3)  | 20 (60.6)    |
| Use of diuretics, %                  | 5 (18.5)                       | 149 (42.2)  | 13 (39.4)    |
| Hypertension treatment, %            | 25 (92.6)                      | 316 (89.5)  | 30 (90.9)    |
| Serum potassium, mg/L                | 4 (0.3)                        | 4.1 (0.4)   | 4.1 (0.4)    |
| Serum creatinine, mg/L               | 1 (0.3)                        | 1.1 (0.3)   | 1.7 (1)      |
| Aspirin use, %                       | 18 (66.7)                      | 234 (67.1)  | 26 (78.8)    |

|                                                |           |            |           |
|------------------------------------------------|-----------|------------|-----------|
| Anticoagulant use, %                           | 16 (59.3) | 186 (53.3) | 14 (42.4) |
| Antiarrhythmics use, %                         | 0         | 4 (1.1)    | 1 (3.0)   |
| Beta-blocker use, %                            | 18 (66.7) | 213 (61)   | 19 (57.6) |
| Angiotensin converting enzyme inhibitor use, % | 10 (37)   | 129 (37)   | 10 (30.3) |
| Angiotensin II receptor antagonists use, %     | 4 (14.8)  | 46 (13.2)  | 4 (12.1)  |
| Aldosterone antagonist use, %                  | 1 (3.7)   | 22 (6.3)   | 1 (3)     |
| Diabetes, %                                    | 18 (72)   | 135 (39)   | 11 (34.4) |
| MI history, %                                  | 0         | 13 (4)     | 0         |
| Stroke history, %                              | 5 (18.5)  | 28 (7.9)   | 2 (6.1)   |
| HF history, %                                  | 7 (25.9)  | 81 (23)    | 12 (36.4) |

Notes: Data are shown as frequency (percentage) or mean (SD).

Supplemental Table S2. Association between serum Mg and major adverse cardiovascular events among participants with prevalent atrial fibrillation, ARIC (N=413)

|            |                           | Mg concentration level (mg/dL) |         |                   |
|------------|---------------------------|--------------------------------|---------|-------------------|
|            |                           | < 1.7                          | 1.7-2.2 | > 2.2             |
| HF (N=308) |                           |                                |         |                   |
|            | Cases, n                  | 6                              | 68      | 5                 |
|            | Incidence rate, /1000 pys | 88.67                          | 45.90   | 45.02             |
|            | Crude model               | 2.06 (0.89, 4.77)              | Ref     | 0.98 (0.40, 2.44) |
|            | Model 1                   | 2.16 (0.92, 5.07)              | Ref     | 1.04 (0.42, 2.58) |
|            | Model 2                   | 2.30 (0.84, 6.27)              | Ref     | 0.76 (0.22, 2.71) |
|            | Model 3                   | 2.41 (0.87, 6.70)              | Ref     | 0.83 (0.23, 2.96) |
| MI (N=346) |                           |                                |         |                   |
|            | Cases, n                  | 3                              | 27      | 4                 |

|                              |                           |                    |       |                    |
|------------------------------|---------------------------|--------------------|-------|--------------------|
| Stroke(N=378)                | Incidence rate, /1000 pys | 27.40              | 15.73 | 28.32              |
|                              | Crude model               | 1.87 (0.57, 6.20)  | Ref   | 1.82 (0.64, 5.21)  |
|                              | Model 1                   | 1.97 (0.57, 6.79)  | Ref   | 1.93 (0.67, 5.59)  |
|                              | Model 2                   | 4.63 (1.06, 20.23) | Ref   | 1.18 (0.29, 4.79)  |
|                              | Model 3                   | 4.49 (1.01, 20.01) | Ref   | 1.01 (0.24, 4.30)  |
|                              | Cases, n                  | 2                  | 18    | 4                  |
| Cardiovascular death (N=413) | Incidence rate, /1000 pys | 17.41              | 9.70  | 25.72              |
|                              | Crude model               | 1.85 (0.43, 7.99)  | Ref   | 2.70 (0.91, 8.00)  |
|                              | Model 1                   | 2.20 (0.49, 9.93)  | Ref   | 2.57 (0.84, 7.86)  |
|                              | Model 2                   | 3.87 (0.68, 22.13) | Ref   | 3.63 (0.81, 16.25) |
|                              | Model 3                   | 5.44 (0.90, 32.76) | Ref   | 5.29 (1.12, 25.09) |
|                              | Cases, n                  | 3                  | 63    | 14                 |
| MACE (N=413)                 | Incidence rate, /1000 pys | 20.19              | 30.59 | 80.72              |
|                              | Crude model               | 0.68 (0.21, 2.16)  | Ref   | 2.69 (1.51, 4.81)  |
|                              | Model 1                   | 0.75 (0.23, 2.40)  | Ref   | 2.28 (1.26, 4.12)  |
|                              | Model 2                   | 1.26 (0.36, 4.43)  | Ref   | 3.15 (1.40, 7.08)  |
|                              | Model 3                   | 1.12 (0.31, 4.05)  | Ref   | 2.99 (1.27, 7.02)  |
|                              | Cases, n                  | 5                  | 88    | 17                 |
| All-cause mortality(N=413)   | Incidence rate, /1000 pys | 34.30              | 43.94 | 101.42             |
|                              | Crude model               | 0.84 (0.34, 2.07)  | Ref   | 2.42 (1.44, 4.08)  |
|                              | Model 1                   | 0.95 (0.38, 2.37)  | Ref   | 2.07 (1.21, 3.52)  |
|                              | Model 2                   | 1.42 (0.53, 3.80)  | Ref   | 2.73 (1.36, 5.49)  |
|                              | Model 3                   | 1.45 (0.53, 3.98)  | Ref   | 2.54 (1.23, 5.27)  |
|                              | Cases, n                  | 5                  | 88    | 17                 |

|                           |                   |       |                   |
|---------------------------|-------------------|-------|-------------------|
| Cases, n                  | 14                | 164   | 20                |
| Incidence rate, /1000 pys | 93.11             | 79.26 | 115.31            |
| Crude model               | 1.21 (0.70, 2.08) | Ref   | 1.49 (0.94, 2.37) |
| Model 1                   | 1.28 (0.74, 2.23) | Ref   | 1.31 (0.82, 2.10) |
| Model 2                   | 1.74 (0.91, 3.33) | Ref   | 1.36 (0.71, 2.60) |
| Model 3                   | 1.66 (0.85, 3.24) | Ref   | 1.28 (0.65, 2.51) |

---

Notes: Results are shown as HR (95% CI)

model 1: crude model+sex, race, age, study center

model 2: model 1+ BMI, drinking status, smoking status, SBP, DBP, LDL, HDL, diabetes, eGFR, use of blood cholesterol medications, serum potassium, serum creatinine, use of anticoagulants, use of aspirin, use of diuretics and antihypertensive medication (loop diuretics, other diuretics, other antihypertensive medication, and no antihypertensive medication)

model 3: model 2 + MI history, stroke history, HF history

For each outcome-specific analysis (HF, stroke, MI) we excluded those who had prior history before visit 5, but not for the combined endpoint.

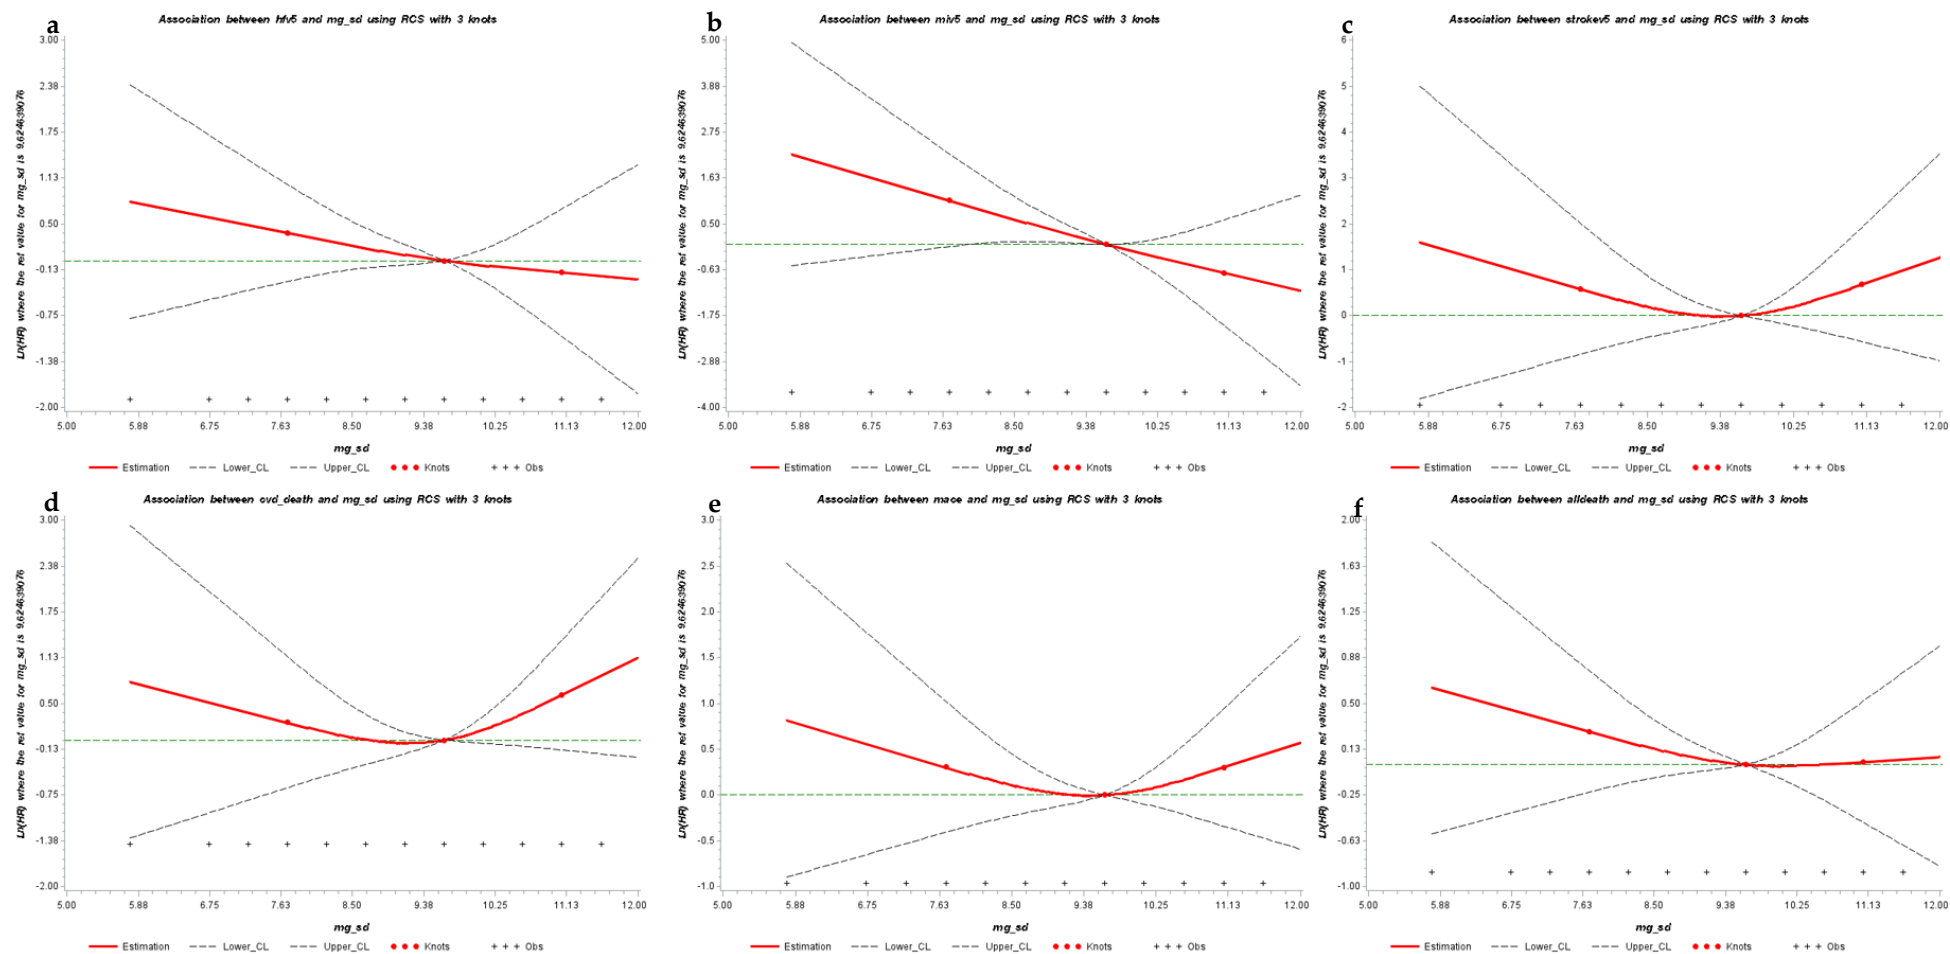

Supplemental Figure S1 (a-f). Association of serum Mg concentration with incidence of a) HF; b) MI; c) stroke; d) CV death; e) MACE; f) all-cause mortality presented as ln(HR) (red line) and 95% confidence intervals (dotted line). Results from Cox proportional hazards model with serum Mg concentration modeled using a

restricted cubic spline with 3 knots (25<sup>th</sup>, 50<sup>th</sup>, and 75<sup>th</sup> percentiles), adjusted for sex, race, age, study center, BMI, drinking status, smoking status, SBP, DBP, LDL, HDL, diabetes, eGFR, use of blood cholesterol medications, serum potassium, serum creatinine, use of anticoagulants, use of aspirin, use of diuretics and antihypertensive medication (loop diuretics, other diuretics, other antihypertensive medication, and no antihypertensive medication), MI history, stroke history, HF history

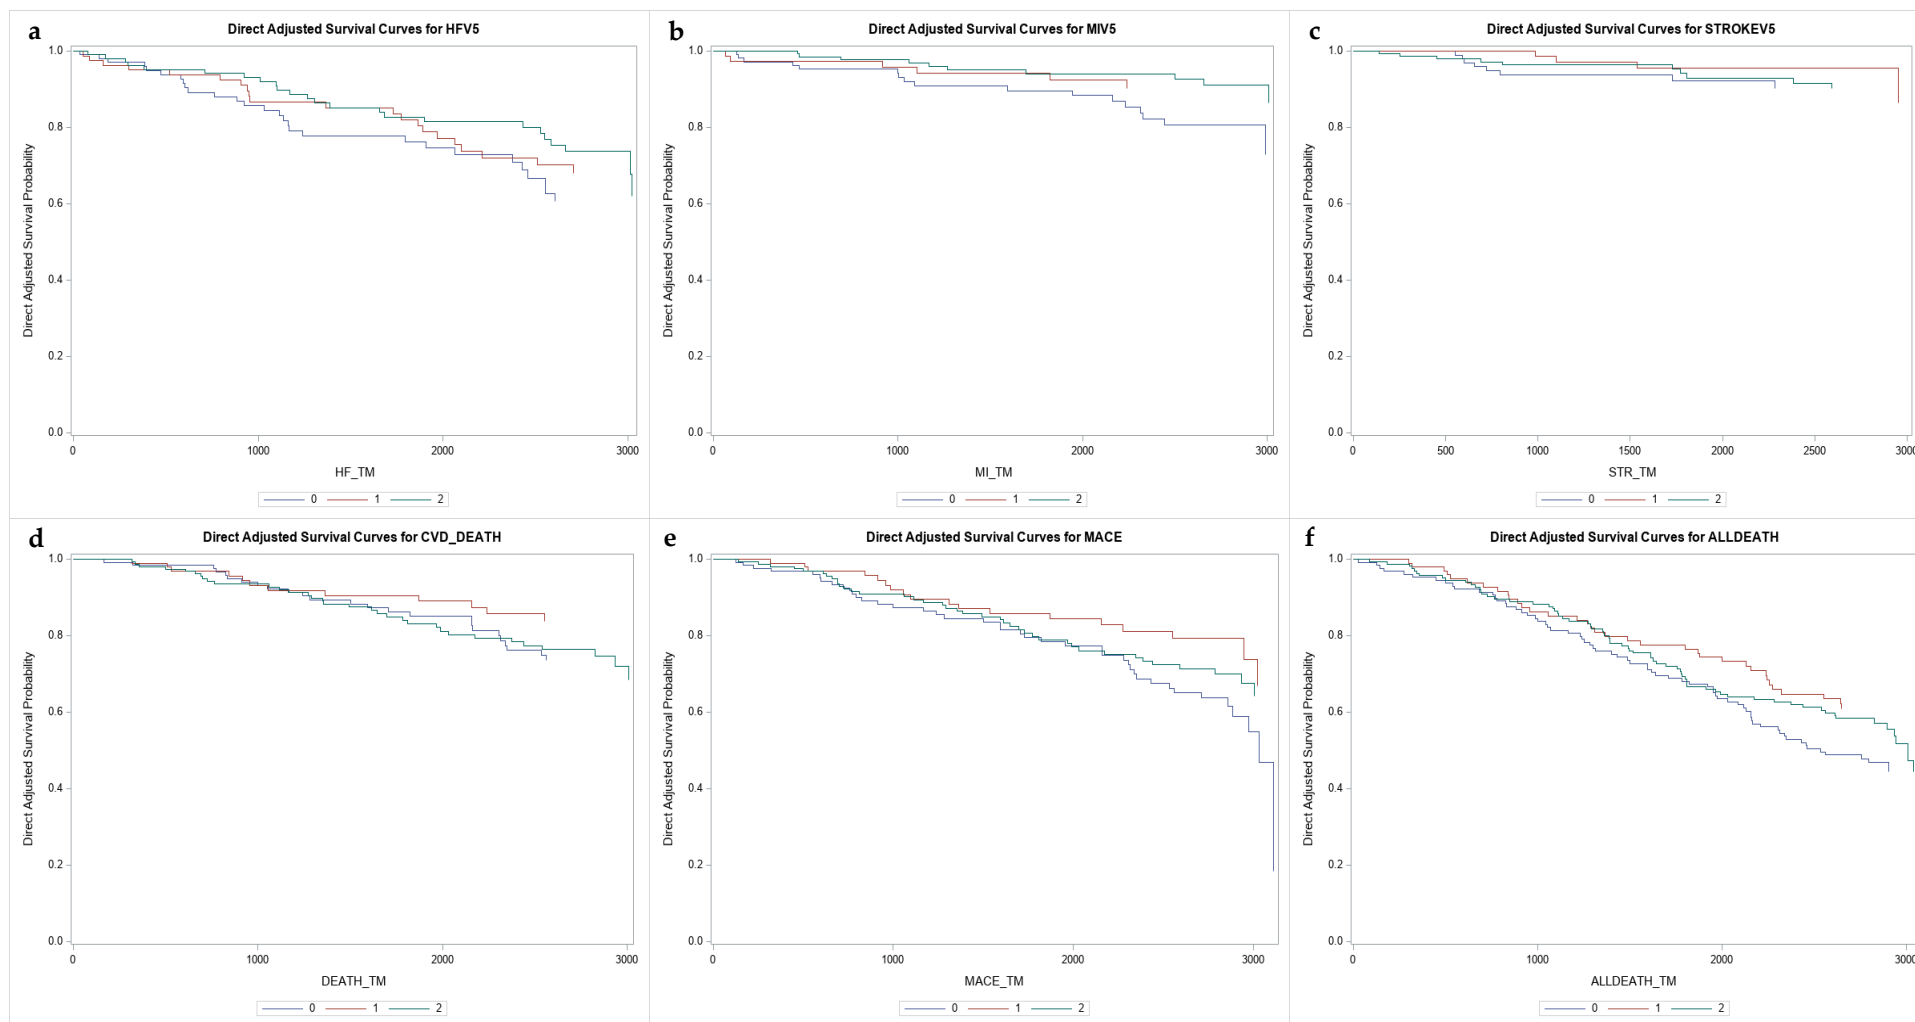

Supplemental Figure S2 (a-f). Direct adjusted survival curves for a) HF; b) MI; c) stroke; d) CV death; e) MACE; f) all-cause mortality, adjusted for sex, race, age, study center, BMI, drinking status, smoking status, SBP, DBP, LDL, HDL, diabetes, eGFR, use of blood cholesterol medications, serum potassium, serum creatinine, use of anticoagulants, use of aspirin, use of diuretics and antihypertensive medication (loop diuretics, other diuretics, other antihypertensive medication, and no antihypertensive medication), MI history, stroke history, HF history. 0,1, and 2 represent Mg concentration tertile.

Supplemental Table S3. Association between serum Mg and major adverse cardiovascular events among participants with prevalent atrial fibrillation, adjusting for additional medications, ARIC (N=413)

|                              | Mg level tertiles (mg/dL) |                   |                   | Continuous<br>per SD (0.2078) |
|------------------------------|---------------------------|-------------------|-------------------|-------------------------------|
|                              | T1<br>(1.2-1.9)           | T2<br>2           | T3<br>(2.1-2.7)   |                               |
| HF (N=308)                   | Ref                       | 0.72 (0.36, 1.46) | 0.70 (0.37, 1.33) | 0.96 (0.71, 1.29)             |
| MI (N=346)                   | Ref                       | 0.34 (0.11, 1.05) | 0.19 (0.06, 0.60) | 0.52 (0.32, 0.84)             |
| Stroke(N=378)                | Ref                       | 0.77 (0.18, 3.30) | 1.15 (0.33, 3.98) | 1.19 (0.65, 2.19)             |
| Cardiovascular death (N=413) | Ref                       | 0.82 (0.37, 1.86) | 1.11 (0.56, 2.16) | 1.20 (0.85, 1.68)             |
| MACE (N=413)                 | Ref                       | 0.77 (0.40, 1.47) | 0.85 (0.49, 1.48) | 1.04 (0.80, 1.36)             |
| All-cause mortality(N=413)   | Ref                       | 0.79 (0.49, 1.26) | 0.95 (0.63, 1.43) | 0.92 (0.75, 1.11)             |

Notes: Results are shown as HR (95% CI)

Models were adjusted for sex, race, age, study center, BMI, drinking status, smoking status, SBP, DBP, LDL, HDL, diabetes,



---

eGFR, use of blood cholesterol medications, serum potassium, serum creatinine, use of anticoagulants, use of aspirin, use of diuretics and antihypertensive medication (loop diuretics, other diuretics, other antihypertensive medication, and no antihypertensive medication), MI history, stroke history, HF history, beta-blocker use, angiotensin converting enzyme inhibitor use, angiotensin II receptor antagonists use, aldosterone antagonist use, antiarrhythmics use.

For each outcome-specific analysis (HF, stroke, MI) we excluded those who had prior history before visit 5, but not for the combined endpoint.
